# Supplementary material
Source: PubMed Central journal article supplement (PMC9616347)
Supplement: mmc1.pdf [file mmc1.pdf]

# Neurotoxicants, the Developing Brain, and Mental Health

## *Supplementary Information*

|                                                            |          |
|------------------------------------------------------------|----------|
| <b>Table S1: Neurotoxicant Sources and Exposure Routes</b> | <b>2</b> |
| <b>Table S2: Helpful Resources and Databases</b>           | <b>3</b> |
| <b>Supplementary References</b>                            | <b>4</b> |

**Table S1: Neurotoxicant Sources and Exposure Routes**

| <b>Neurotoxin</b>                                                                          | <b>Sources</b>                                                                                                                                                                                                           | <b>External Exposure Route(s)</b>        | <b>Notes</b>                                                                                                                                                                                                            | <b>Reference(s)</b> |
|--------------------------------------------------------------------------------------------|--------------------------------------------------------------------------------------------------------------------------------------------------------------------------------------------------------------------------|------------------------------------------|-------------------------------------------------------------------------------------------------------------------------------------------------------------------------------------------------------------------------|---------------------|
| Bisphenol A (BPA)                                                                          | Reusable plastic bottles, baby bottles, food storage containers, microwave ovenware, internal coating for food and beverage containers, paper currencies, thermal paper                                                  | Ingestion, Inhalation, Dermal Absorption | Used in manufacturing of polymers, including polycarbonate, epoxy resin, polysulfone, and polyacrylate. Migration of Bisphenol A occurs from cans, plastic containers, and beverage cans into liquid and food.          | (1,2)               |
| Phthalates (Low Molecular Weight)                                                          | Pharmaceuticals, Cosmetics, Personal care products, Packaging                                                                                                                                                            | Ingestion; Dermal Absorption; Inhalation | Phthalate metabolites of molecular weights < 250 Da                                                                                                                                                                     | (3,4)               |
| Phthalates (High Molecular Weight)                                                         | Polyvinyl chloride plastics                                                                                                                                                                                              | Ingestion; Dermal Absorption; Inhalation | Phthalate metabolites with molecular weights >250 Da                                                                                                                                                                    | (4)                 |
| Polychlorinated Biphenyls (PCBs)                                                           | Capacitor and transformer oils, Hydraulic fluids, Lubricating oils, Plasticizers                                                                                                                                         | Ingestion; Dermal Absorption; Inhalation | Synthetic organochlorine compounds were banned in the 1970s but are still ubiquitous and persistent in the environment.                                                                                                 | (5–8)               |
| Particulate Matter with aerodynamic diameter $\leq 2.5$ $\mu\text{m}$ (PM <sub>2.5</sub> ) | Primary sources: Road dust, industrial and commercial processes, agricultural processes, wildfires, vehicle emissions;<br>Secondary sources: Interactions between gas-phase chemical compounds in the ambient atmosphere | Inhalation                               | Comprised of a mixture of small liquid and solid particles suspended in the air; can include elemental carbon, sulfate, nitrate, ammonium, hydrogen ions, low and moderate volatility organic compounds, metal mixtures | (9)                 |
| Lead                                                                                       | Lead-based paint in buildings, Lead-contaminated drinking water pipes, Dust, Soil deposits                                                                                                                               | Ingestion and Inhalation                 |                                                                                                                                                                                                                         | (10)                |

**Table S2: Helpful Resources and Databases**

| Resource                                                                                                                                                                                                                                                                              | Link                                                                                                                                              |
|---------------------------------------------------------------------------------------------------------------------------------------------------------------------------------------------------------------------------------------------------------------------------------------|---------------------------------------------------------------------------------------------------------------------------------------------------|
| Known Chemical Brain Drainers                                                                                                                                                                                                                                                         | <a href="https://braindrain.dk/known-chemical-brain-drainers/">https://braindrain.dk/known-chemical-brain-drainers/</a>                           |
| Integrated Science Assessment (ISA) for Particulate Matter (Final Report, Dec 2019)                                                                                                                                                                                                   | <a href="https://ofmpub.epa.gov/eims/eimscomm.getfile?p_download_id=539935">https://ofmpub.epa.gov/eims/eimscomm.getfile?p_download_id=539935</a> |
| “EDC-2: The Endocrine Society's Second Scientific Statement on Endocrine-Disrupting Chemicals”                                                                                                                                                                                        | <a href="https://doi.org/10.1210/er.2015-1010">https://doi.org/10.1210/er.2015-1010</a>                                                           |
| Agency for Toxic Substances and Disease Registry's Substance Priority List                                                                                                                                                                                                            | <a href="https://www.atsdr.cdc.gov/spl/index.html#2019spl">https://www.atsdr.cdc.gov/spl/index.html#2019spl</a>                                   |
| Ambient Air Pollution: A global assessment of exposure and burden of disease                                                                                                                                                                                                          | <a href="https://apps.who.int/iris/handle/10665/250141">https://apps.who.int/iris/handle/10665/250141</a>                                         |
| Gore A, Chappell V, Fenton S, Flaws J, Nadal A, Prins G. <b>EDC-2: the Endocrine Society's second scientific statement on endocrine-disrupting chemicals.</b> <i>Endocr Rev.</i> 2015;36:E1-150 (13)                                                                                  | <a href="https://doi.org/10.1210/er.2015-1010">https://doi.org/10.1210/er.2015-1010</a>                                                           |
| Braithwaite I, Zhang S, Kirkbride JB, Osborn DPJ, Hayes JF. <b>Air Pollution (Particulate Matter) Exposure and Associations with Depression, Anxiety, Bipolar, Psychosis and Suicide Risk: A Systematic Review and Meta-Analysis.</b> <i>Environ Health Perspect.</i> 127(12):126002. | <a href="https://doi.org/10.1289/EHP4595">https://doi.org/10.1289/EHP4595</a>                                                                     |
| Theron LC, Abreu-Villaça Y, Augusto-Oliveira M, Brennan C, Crespo-Lopez ME, de Paula Arrifano G, et al. <b>A systematic review of the mental health risks and resilience among pollution-exposed adolescents.</b> <i>J Psychiatr Res.</i> 2022 Feb;146:55–66.                         | 10.1016/j.jpsychires.2021.12.012                                                                                                                  |

## Supplementary References

1. Geens T, Aerts D, Berthot C, Bourguignon J-P, Goeyens L, Lecomte P, et al. A review of dietary and non-dietary exposure to bisphenol-A. *Food Chem Toxicol*. 2012 Oct 1;50(10):3725–40.
2. Healy BF, English KR, Jagals P, Sly PD. Bisphenol A exposure pathways in early childhood: Reviewing the need for improved risk assessment models. *J Expo Sci Environ Epidemiol*. 2015 Nov;25(6):544–56.
3. Miodovnik A, Edwards A, Bellinger DC, Hauser R. Developmental neurotoxicity of ortho-phthalate diesters: Review of human and experimental evidence. *NeuroToxicology*. 2014 Mar 1;41:112–22.
4. Qian X, Li J, Xu S, Wan Y, Li Y, Jiang Y, et al. Prenatal exposure to phthalates and neurocognitive development in children at two years of age. *Environ Int*. 2019 Oct 1;131:105023.
5. Jacobson JL, Jacobson SW. Prenatal exposure to polychlorinated biphenyls and attention at school age. *J Pediatr*. 2003 Dec;143(6):780–8.
6. Verner M-A, Plusquellec P, Muckle G, Ayotte P, Dewailly É, Jacobson SW, et al. Alteration of infant attention and activity by polychlorinated biphenyls: Unravelling critical windows of susceptibility using physiologically based pharmacokinetic modeling. *NeuroToxicology*. 2010 Sep 1;31(5):424–31.
7. Boucher O, Muckle G, Bastien CH. Prenatal Exposure to Polychlorinated Biphenyls: A Neuropsychologic Analysis. *Environ Health Perspect*. 2009 Jan;117(1):7–16.
8. Dewalque L, Pirard C, Charlier C. Measurement of Urinary Biomarkers of Parabens, Benzophenone-3, and Phthalates in a Belgian Population. *BioMed Res Int*. 2014;2014:649314.
9. US Environmental Protection Agency. Integrated science assessment (ISA) for particulate matter: final report [Internet]. 2019 [cited 2021 Apr 16]. Available from: [https://ofmpub.epa.gov/eims/eimscomm.getfile?p\\_download\\_id=539935](https://ofmpub.epa.gov/eims/eimscomm.getfile?p_download_id=539935)
10. Levin R, Brown MJ, Kashtock ME, Jacobs DE, Whelan EA, Rodman J, et al. Lead Exposures in U.S. Children, 2008: Implications for Prevention. *Environ Health Perspect*. 2008 Oct;116(10):1285–93.
11. Grandjean P, Landrigan PJ. Developmental neurotoxicity of industrial chemicals. *The Lancet*. 2006 Dec 16;368(9553):2167–78.
12. Grandjean P, Landrigan PJ. Neurobehavioural effects of developmental toxicity. *Lancet Neurol*. 2014 Mar 1;13(3):330–8.
13. Gore A, Chappell V, Fenton S, Flaws J, Nadal A, Prins G. EDC-2: the Endocrine Society’s second scientific statement on endocrine-disrupting chemicals. *Endocr Rev*. 2015;36:E1-150.
14. Braithwaite I, Zhang S, Kirkbride JB, Osborn DPJ, Hayes JF. Air Pollution (Particulate Matter) Exposure and Associations with Depression, Anxiety, Bipolar, Psychosis and Suicide Risk: A Systematic Review and Meta-Analysis. *Environ Health Perspect*. 127(12):126002.
15. Theron LC, Abreu-Villaça Y, Augusto-Oliveira M, Brennan C, Crespo-Lopez ME, de Paula Arrifano G, et al. A systematic review of the mental health risks and resilience among pollution-exposed adolescents. *J Psychiatr Res*. 2022 Feb;146:55–66.
